# Supplementary material
Source: PubMed Central journal article supplement (PMC7205969)
Supplement: 13205_2020_2218_MOESM1_ESM.pdf [file 13205_2020_2218_MOESM1_ESM.pdf]

## **Supplementary Information**

### **Extracellular Synthesis of Silver Nanoparticles by *Thiosphaera pantotropha* and Evaluation of Their Antibacterial and Cytotoxic Effects**

Sharda Bharti<sup>a</sup>, Soumyo Mukherji<sup>b</sup> and Suparna Mukherji<sup>a\*</sup>

<sup>a</sup>Environmental Science and Engineering Department, IIT Bombay, Mumbai, India-400076

<sup>b</sup>Department of Bioscience and Bioengineering, IIT Bombay, Mumbai, India-400076

\*Corresponding Author: Professor, CESE, IIT Bombay; Email: [mitras@iitb.ac.in](mailto:mitras@iitb.ac.in)  
Phone: 91-(022)-2576-7854

This supplementary information consists of 4 pages, which contains 5 figures.

#### **S1: Preparation of GK Media:**

The constituents (g/L) of GK media were as follows: Na<sub>2</sub>HPO<sub>4</sub> (7.9), KH<sub>2</sub>PO<sub>4</sub> (1.5), KNO<sub>3</sub> (2.2), KNO<sub>2</sub> (0.84), NH<sub>4</sub>Cl (0.3), CH<sub>3</sub>COONa (1.64), MgSO<sub>4</sub>.7H<sub>2</sub>O (0.3). In GK media, trace metals were added from a stock solution (2 ml/L). The trace metal stock solution was prepared using the following constituents (g/L): ethylenediaminetetraacetic acid (EDTA, 50), ZnSO<sub>4</sub> (2.2), CaCl<sub>2</sub> (5.5), MnCl<sub>2</sub>.4H<sub>2</sub>O (5.06), FeSO<sub>4</sub>.7H<sub>2</sub>O (5.0), (NH<sub>4</sub>)<sub>6</sub>Mo<sub>7</sub>O<sub>24</sub>.4H<sub>2</sub>O (1.1), CuSO<sub>4</sub>.5H<sub>2</sub>O (1.57) and CoCl<sub>2</sub>.6H<sub>2</sub>O (1.61).

The media components of GK media (except MgSO<sub>4</sub> and trace metal solution) were added to deionized water in the required amount and the media was autoclaved. MgSO<sub>4</sub> and trace metal solution were filter sterilized and added to the pre-sterilized GK media.

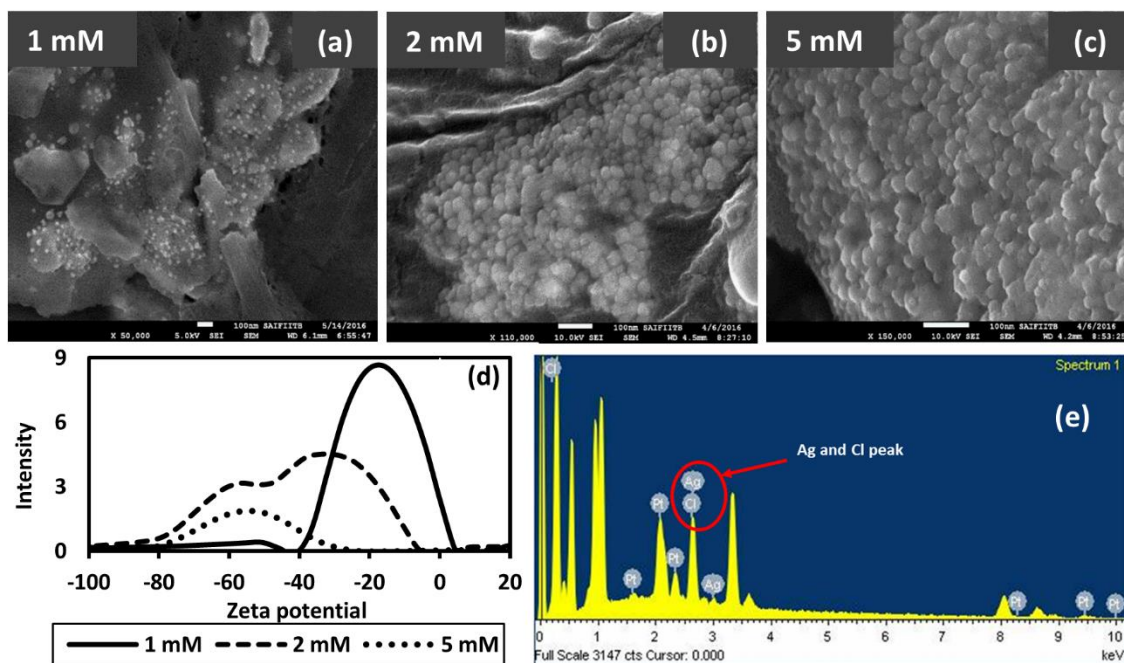

**Fig. S1** (a, b, c) FEG-SEM images, (d) zeta potential of Ag/AgCl NPs synthesized using 1, 2 and 5 mM AgNO<sub>3</sub> at neutral pH and 37°C temperature, respectively and (e) EDS spectra of AgNPs synthesized using 2 mM AgNO<sub>3</sub> at neutral pH and 37°C temperature.

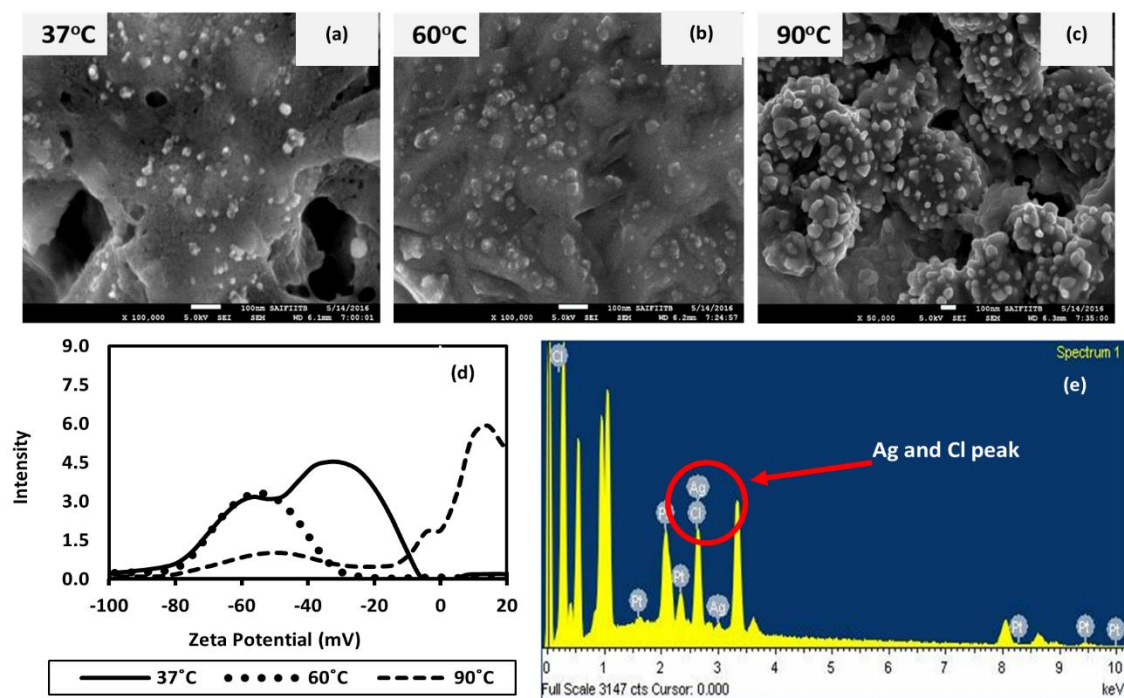

**Fig. S2** (a, b, c) FEG-SEM images, (d) zeta potential of Ag/AgCl NPs synthesized using 2 mM AgNO<sub>3</sub> at neutral pH and 37°C, 60°C and 90°C temperature, respectively and (e) EDS spectra AgNPs synthesized using 2 mM AgNO<sub>3</sub> at neutral pH and 37°C temperature.

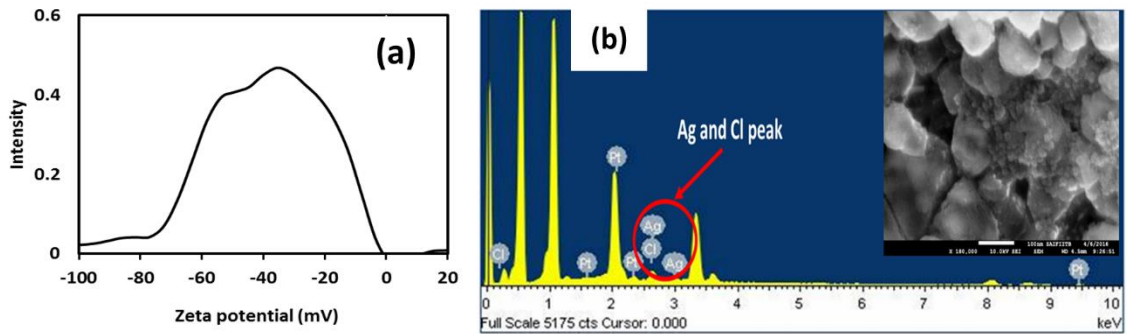

**Fig. S3** (a) zeta potential and (b) EDS spectra (Inset: FEG-SEM images) of Ag/AgCl NPs synthesized using GK media culture supernatant with 2 mM AgNO<sub>3</sub> at neutral pH and 37°C temperature.

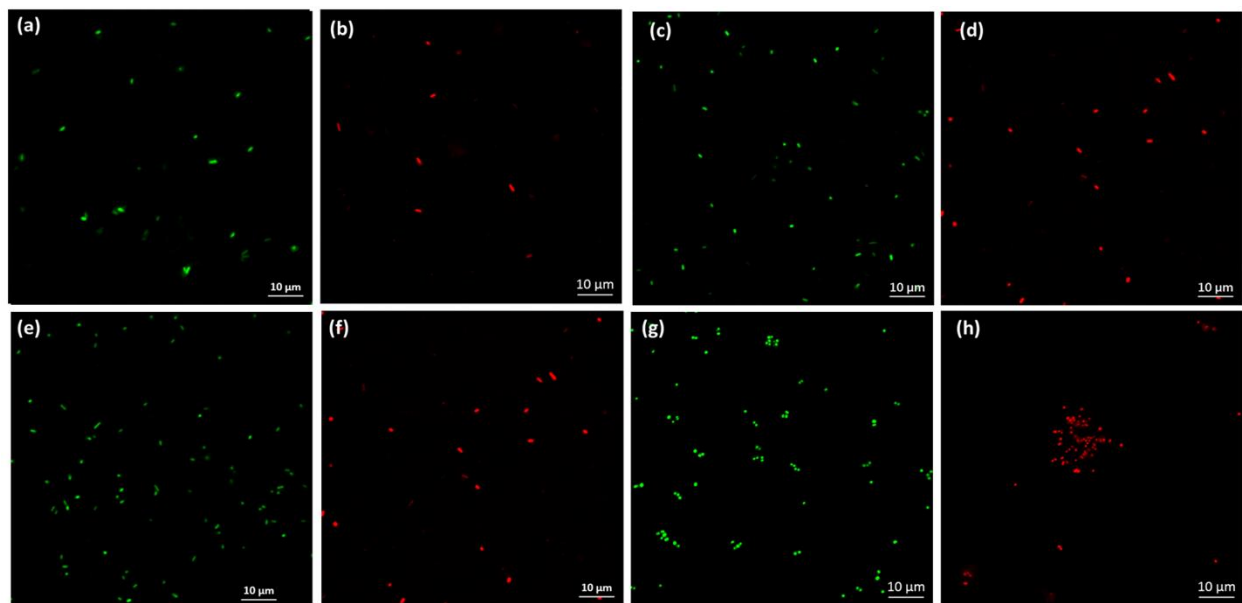

**Fig. S4** CLSM images of bacterial strains (a, b) *E. coli* (c, d) *P. aeruginosa* (e, f) *B. subtilis* (g, h) *S. aureus* before and after treatment with Ag/AgCl NPs (at MBC concentration), respectively. Green and red fluorescence represents live and dead/damaged bacterial cells, respectively.

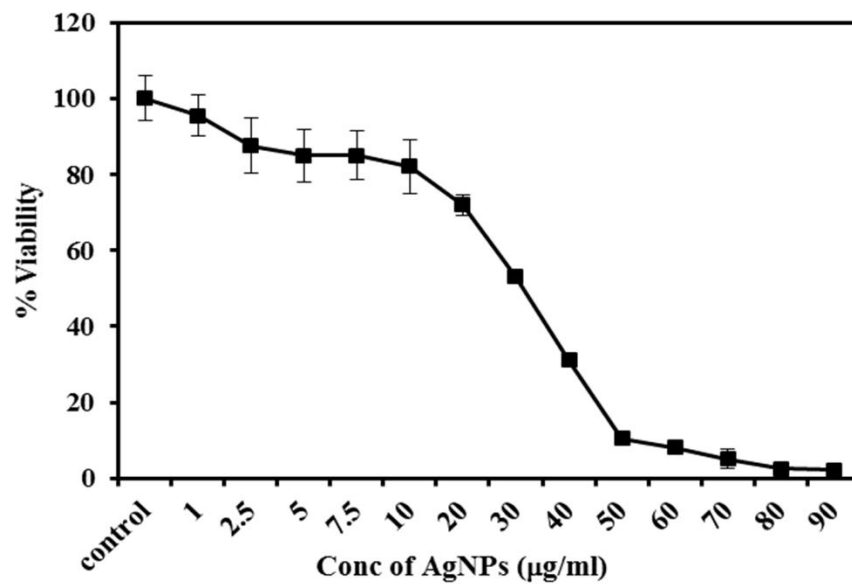

**Fig. S5** Dose dependent cytotoxicity of AgNPs on MCF-7 cell line: Increased concentration of AgNPs (1–90 µg/ml) inhibited the growth of cell lines up to 100%.
